# Supplementary material for: Discrete dispersion of single-walled carbon nanotubes
Source: Royal Society of Chemistry journal article supplement (doi:10.1039/b419039d), 2005-01-01
Supplement: b419039d.pdf [file b419039d.pdf]

**Electronic Supplementary Information**

**Non-destructive Debundling of Full-length Single-walled Carbon Nanotubes**

Qingwen Li, Ian A. Kinloch and Alan H. Windle\*

*Department of Materials Science and Metallurgy, University of Cambridge, Pembroke Street, Cambridge, CB2 3QZ, UK; \* E-mail: [ahw1@cam.ac.uk](mailto:ahw1@cam.ac.uk)*

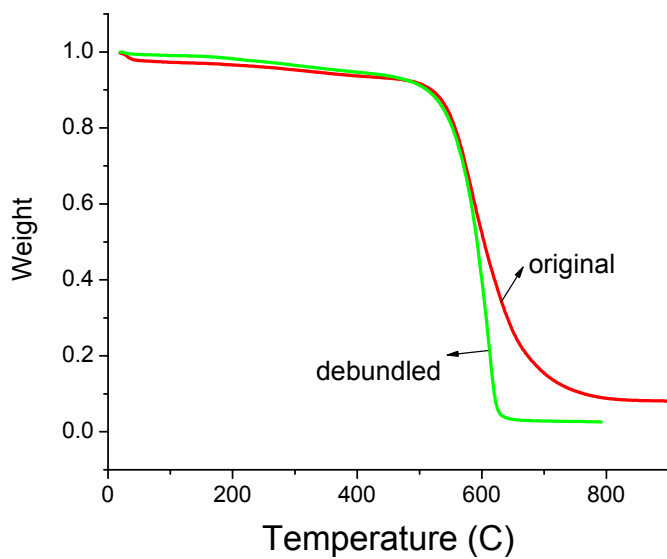

Fig.1 TGA curves of the SWNTs before (red) and after (green) the debundling treatment

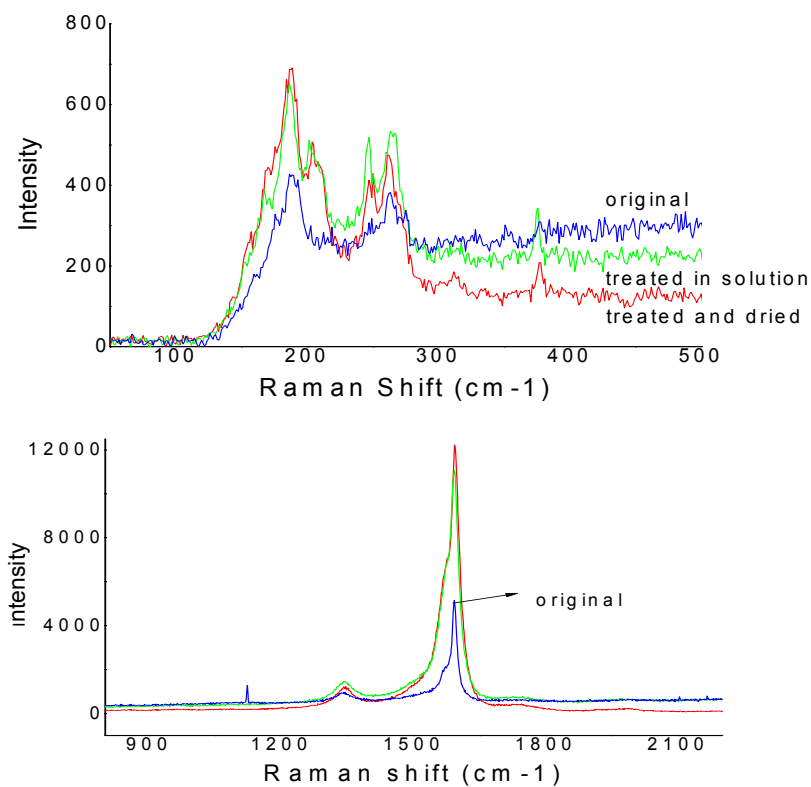

Fig.2 Raman spectra of SWNTs before and after applying the debundling treatment; the top spectra shows the RBM region and the lower spectra shows the G and D peaks. (Key: Blue line: original sample prior to treatment; Green line: treated sample in ethanol; Red line: treated sample dried in a vacuum.)
